# Supplementary material for: Local processes with a global impact: unraveling the dynamics of gas evasion in a step-and-pool configuration
Source: Copernicus journal article supplement (doi:10.5194/bg-20-3261-2023), 2023-08-11
Supplement: Supplementary file 1 [file bg-20-3261-2023-supplement.zip]

Archive with 2 entries (2 files):
- air_entrainment.mp4
- bg-20-3261-2023-supplement-title-page.pdf
