# Supplementary material for: Local processes with a global impact: unraveling the dynamics of gas evasion in a step-and-pool configuration
Source: Copernicus journal article supplement (doi:10.5194/bg-20-3261-2023), 2023-08-11
Supplement: Supplementary file 1 [file bg-20-3261-2023-supplement.zip › bg-20-3261-2023-supplement-title-page.pdf]

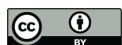

## *Supplement of*

# **Local processes with a global impact: unraveling the dynamics of gas evasion in a step-and-pool configuration**

**Paolo Peruzzo et al.**

*Correspondence to:* Paolo Peruzzo (paolo.peruzzo@dicea.unipd.it)

- bg-20-3261-2023-supplement-title-page.pdf
- air\_entrainment.mp4

The copyright of individual parts of the supplement might differ from the article licence.
